# Supplementary material
Source: MDPI journal article supplement (https://www.mdpi.com/2073-4395/11/3/522)
Supplement: s1 [file s1]

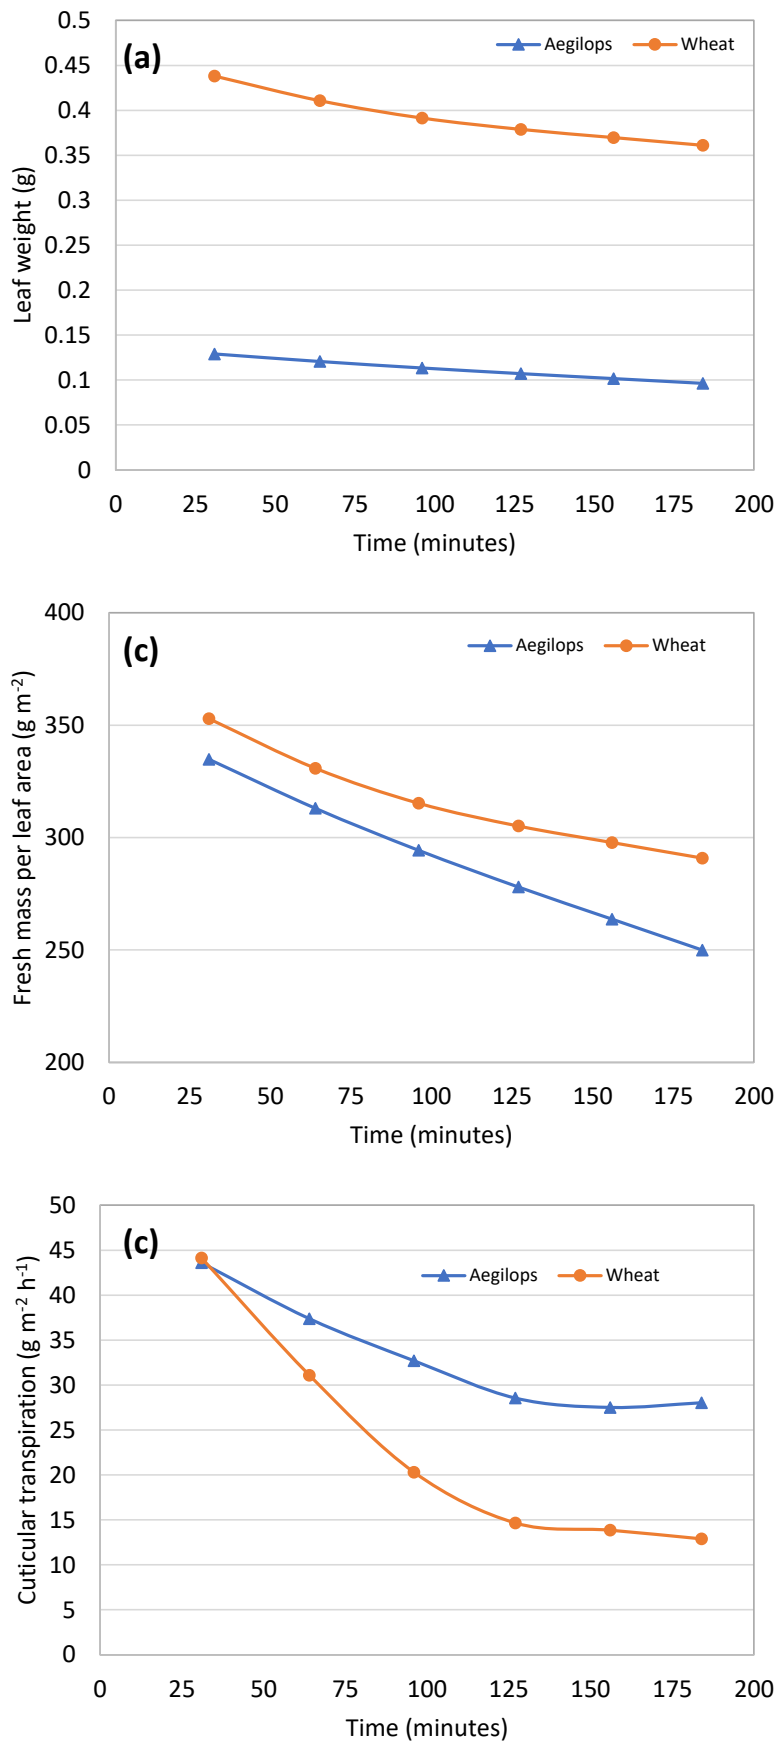

**Supplementary Materials Figure S1.** An example of the data observed by the gravimetric analysis within the analysis of cuticular transpiration in wheat and *Aegilops* leaves. **(a)** The values of leaf fresh weight. **(b)** The values of leaf fresh weight recalculated per leaf area unit. **(c)** The rate of the decrease of fresh leaf mass per leaf area unit representing the value of cuticular transpiration.
